# Supplementary material for: Breakpoint profiling of 64 cancer genomes reveals numerous complex rearrangements spawned by homology-independent mechanisms
Source: HighWire-hosted journal article supplement (doi:10.1101/gr.143677.112), 2013-02-14
Supplement: Supp_Table_1.xlsx [file Supp_Table_1.xlsx]

## Sheet: KEY
Supplementary Table 1: Summary of TCGA datasets analyzed
COLUMN NUMBER	COLUMN KEY
1	Sample	Dataset name (Index)
2	TCGA Name	Official TCGA dataset name
3	Source Tissue	The source of the patient sample (tumor, blood, normal tissue)
4	Mapped Readpairs	Number of readpairs with itself and mate mapped
5	Read Length	Weighted average of read lengths across all read groups
6	Insert Size	Weighted average of insert size across all read groups
7	Insert Size (Std Dev)	Weighted standard deviation of insert size across all read groups
8	Genome Cov.	Genome coverage based upon actual sequence coverage
9	Spanning Cov.	Physical coverage based upon inner span (Insert size - 2*read length)
10	Num. Hydra	Number of HYDRA-MULTI calls per dataset
11	Num. Validated	Number of validated (successfully assembled) HYDRA-MULTI calls per dataset
12	Validation Rate	Validation rate of the HYDRA-MULTI calls
13	Dedup Rate	Percent of duplicate readpairs found in each dataset
14	Discordant Rate	Percent discordant reads extracted from each dataset

## Sheet: DATASET_STATS
Sample	TCGA Name	Source Tissue	Mapped Readpairs	Read Length	Insert Size	Insert Size (Std Dev)	Genome Cov.	Spanning Cov.	Num. Hydra	Num. Validated	Validation Rate	Dedup Rate	Discordant Rate
BRCA_1_T	TCGA-A2-A04P-01A-31D-A128-09	Tumor	512852619	100	241.928	82.4305	33.0873	9.59252	2989	916	0.306457	0.00718223	0.00754787
BRCA_1_B	TCGA-A2-A04P-10A-01D-A128-09	Blood	661129158	100	208.376	80.8639	42.6535	7.81579	2745	646	0.235337	0.101082	0.00168168
BRCA_2_T	TCGA-A2-A04T-01A-21D-A128-09	Tumor	594081761	100	265.331	76.1272	38.3279	14.0946	2282	791	0.346626	0.0629545	0.00192294
BRCA_2_B	TCGA-A2-A04T-10A-01D-A128-09	Blood	726729152	100	217.553	80.2705	46.8858	9.75249	2586	593	0.229312	0.0490142	0.00331238
BRCA_3_T	TCGA-A2-A0CM-01A-31D-A128-09	Tumor	719777420	100	206.653	91.5968	46.4373	9.28524	5262	1289	0.244964	0.00344312	0.0282054
BRCA_3_B	TCGA-A2-A0CM-10A-01D-A128-09	Blood	512122525	100	275.507	63.8513	33.0402	13.0876	2537	845	0.333071	0.0483939	0.00414924
BRCA_4_T	TCGA-A2-A0D0-01A-11D-A128-09	Tumor	756302100	100	227.085	81.5206	48.7937	11.6725	2738	817	0.298393	0.0417486	0.00282712
BRCA_4_B	TCGA-A2-A0D0-10A-01D-A128-09	Blood	487256185	100	218.633	81.6919	31.4359	6.71694	2595	634	0.244316	0.0360131	0.00373093
BRCA_5_T	TCGA-A2-A0D2-01A-21D-A128-09	Tumor	654847238	100	218.303	84.7521	42.2482	9.24489	2575	762	0.295922	0.0116401	0.00706354
BRCA_5_B	TCGA-A2-A0D2-10A-01D-A128-09	Blood	613392027	100	221.897	81.3448	39.5737	8.81569	2231	566	0.253698	0.0308017	0.00425511
BRCA_6_T	TCGA-A7-A0CE-01A-11D-A12L-09	Tumor	593679524	100	195.348	83.2547	38.3019	5.92423	2506	611	0.243815	0.0466915	0.00438369
BRCA_6_S	TCGA-A7-A0CE-11A-21D-A12L-09	Normal Tissue	655875046	100	186.623	79.6492	42.3145	5.39601	2724	465	0.170705	0.0848098	0.00218545
BRCA_7_T	TCGA-AO-A0J4-01A-11D-A128-09	Tumor	577043685	100	208.057	81.68	37.2286	6.85067	2858	860	0.30091	0.00617143	0.00861988
BRCA_7_B	TCGA-AO-A0J4-10A-01D-A128-09	Blood	581432224	100	220.127	82.1745	37.5118	8.21849	2491	585	0.234845	0.0441087	0.0037234
BRCA_8_T	TCGA-AO-A0J6-01A-11D-A128-09	Tumor	551143850	100	218.754	86.3586	35.5577	7.94376	2772	745	0.268759	0.00347676	0.0125488
BRCA_8_B	TCGA-AO-A0J6-10A-01D-A128-09	Blood	625206686	100	228.509	81.0995	40.3359	9.79786	2063	517	0.250606	0.0432973	0.00318319
BRCA_9_T	TCGA-BH-A0B3-01A-11D-A128-09	Tumor	622815268	100	181.912	77.3676	40.1816	4.55422	3165	715	0.225908	0.0223205	0.00561658
BRCA_9_S/B	TCGA-BH-A0B3-11B-21D-A128-09 / TCGA-BH-A0B3-10A-01D-A128-09	Blood and Normal Tissue	1181823050	100	186.683	80.0437	76.2466	9.79961	4150	1015	0.244578	0.0312779	0.00511593
BRCA_10_T	TCGA-BH-A0B9-01A-11D-A128-09	Tumor	703273019	100	155.533	74.4395	45.3725	2.85559	2712	578	0.213127	0.0401798	0.00218527
BRCA_10_B	TCGA-BH-A0B9-10A-01D-A128-09	Blood	614027053	100	184.914	80.7221	39.6146	4.99267	3900	825	0.211538	0.0121146	0.00776317
BRCA_11_T	TCGA-BH-A0E0-01A-11D-A128-09	Tumor	654966241	100	168.605	73.2078	42.2559	3.41184	3360	1003	0.298512	0.0732211	0.00221047
BRCA_11_B	TCGA-BH-A0E0-10A-01D-A128-09	Blood	490756642	100	191.851	73.8781	31.6617	4.05401	2563	696	0.271557	0.0598171	0.00254152
BRCA_12_T	TCGA-BH-A0WA-01A-11D-A128-09	Tumor	540005869	100	170.073	73.0311	34.8391	2.88845	3145	1148	0.365024	0.0691931	0.00238495
BRCA_12_B	TCGA-BH-A0WA-10A-01D-A128-09	Blood	535613824	100	200.975	86.4197	34.5557	6.04216	2220	455	0.204955	0.0878878	0.00178955
COAD_1_T	TCGA-AA-3518-01A-02D-1525-10	Tumor	545143415	100	296.232	50.7409	35.1705	17.0162	2863	1055	0.368495	0.1428	0.00152069
COAD_1_B	TCGA-AA-3518-10A-01D-1525-10	Blood	507634792	100	273.957	46.9524	32.7506	12.3076	2450	1183	0.482857	0.0800252	0.0016629
COAD_2_T	TCGA-AA-3534-01A-01D-1525-10	Tumor	592264870	100	290.789	66.1067	38.2106	17.8382	1885	565	0.299735	0.100498	0.00205676
COAD_2_B	TCGA-AA-3534-10A-01D-1525-10	Blood	463332340	100	271.555	49.388	29.8924	10.9441	2509	1211	0.482662	0.113862	0.00166855
COAD_3_T	TCGA-AA-A00R-01A-01D-A126-10	Tumor	547844034	100	253.948	61.6957	35.3448	10.6745	2190	802	0.36621	0.0976405	0.0014308
COAD_3_B	TCGA-AA-A00R-10A-01D-A126-10	Blood	495651431	100	264.243	81.3235	31.9775	11.8559	1979	601	0.303689	0.00466455	0.05221
GBM_2_T	TCGA-06-0145-01A-01D-0507-08	Tumor	821810844	101	257.868	132.162	53.5503	22.6225	3142	629	0.200191	0.1234	0.00155462
GBM_2_B	TCGA-06-0145-10A-01D-0507-08	Blood	800332941	101	257.302	129.335	52.1507	21.6555	3065	602	0.196411	0.0634271	0.00201593
GBM_3_T	TCGA-06-0152-01A-02D-0507-08	Tumor	605738980	102.387	233.106	116.261	40.0127	12.098	2593	650	0.250675	0.149978	0.00107551
GBM_3_B	TCGA-06-0152-10A-01D-0507-08	Blood	549636858	102.374	238.523	118.809	36.3022	11.7265	2548	651	0.255495	0.105083	0.00134325
GBM_4_T	TCGA-06-0155-01B-01D-0932-09	Tumor	673965266	100	209.336	74.304	43.4816	7.50555	4480	640	0.142857	0.0928144	0.0030924
GBM_4_B	TCGA-06-0155-10A-01D-0703-09	Blood	546030067	100	189.303	74.9451	35.2277	4.37436	4043	599	0.148157	0.163784	0.00164622
GBM_5_T	TCGA-06-0185-01A-01D-0507-08	Tumor	448156251	97.9228	206.693	109.117	28.3127	7.11146	3170	727	0.229338	0.0171233	0.011876
GBM_5_B	TCGA-06-0185-10B-01D-0507-08	Blood	416905337	96.7669	198.578	106.94	26.0275	6.0779	3036	733	0.241436	0.0256537	0.0070374
GBM_6_T	TCGA-06-0188-01A-01D-0373-08	Tumor	738814902	76	314.676	156.824	36.2258	41.6712	4397	643	0.146236	0.147095	0.00374573
GBM_6_B	TCGA-06-0188-10B-01D-0373-08	Blood	652558526	75.0142	280.681	150.195	31.5814	30.8653	4482	504	0.11245	0.123623	0.00465428
GBM_7_T	TCGA-06-0208-01A-01D-0512-09	Tumor	626106438	67.7261	192.66	69.3571	27.3573	13.183	5202	1473	0.28316	0.0728426	0.00235255
GBM_7_B	TCGA-06-0208-10A-01D-0512-09	Blood	657590233	73.4062	220.684	68.9675	31.1427	16.7394	5449	1453	0.266654	0.0867456	0.00191687
GBM_8_T	TCGA-06-0214-01A-02D-0512-09	Tumor	665192774	74.9837	193.677	66.2765	32.1798	11.5541	5141	1548	0.301109	0.0867207	0.00165999
GBM_8_B	TCGA-06-0214-10A-01D-0512-09	Blood	754846302	69.8904	186.751	61.3876	34.0364	13.3536	5962	1417	0.237672	0.0742806	0.00229902
GBM_9_T	TCGA-06-0648-01A-01D-0507-08	Tumor	540742742	100.256	232.687	117.461	34.9761	11.2796	3355	729	0.217288	0.145954	0.00131671
GBM_9_B	TCGA-06-0648-10A-01D-0507-08	Blood	886892426	100.557	226.949	108.089	57.5378	16.3614	3134	589	0.187939	0.159268	0.000795755
GBM_10_T	TCGA-06-0877-01A-01D-0512-09	Tumor	770804314	67.7337	182.782	69.3433	33.6835	14.3153	4842	1434	0.296159	0.0770253	0.00255928
GBM_10_B	TCGA-06-0877-10A-01D-0512-09	Blood	716646389	75	201.646	68.7745	34.6764	14.0148	4992	1333	0.267027	0.0719958	0.00177585
GBM_11_T	TCGA-06-0881-01A-02D-0512-09	Tumor	641666557	75	174.94	61.0817	31.0484	8.03562	4576	1487	0.324956	0.0665777	0.00211815
GBM_11_B	TCGA-06-0881-10A-01D-0512-09	Blood	601790604	69.9244	192.41	71.4536	27.1483	12.0771	4759	1537	0.322967	0.084074	0.00234595
GBM_12_T	TCGA-06-1086-01A-02D-0932-09	Tumor	564509626	100	212.534	74.2781	36.42	6.61195	4517	536	0.118663	0.101556	0.00353713
GBM_12_B	TCGA-06-1086-10A-01D-0703-09	Blood	535055367	100	179.317	64.0711	34.5197	2.85541	3718	638	0.171598	0.211661	0.00103803
GBM_13_T	TCGA-14-0786-01B-01D-0932-09	Tumor	618541791	100	218.635	73.2337	39.9059	7.86942	4196	636	0.151573	0.0621779	0.00611972
GBM_13_B	TCGA-14-0786-10A-01D-0703-09	Blood	514763626	100	191.62	83.5412	33.2106	4.86198	3412	504	0.147714	0.0965263	0.00293734
GBM_14_T	TCGA-14-1401-01A-01D-0703-09	Tumor	693934548	100	156.546	60.2285	44.77	1.85272	4024	626	0.155567	0.195729	0.000994587
GBM_14_B	TCGA-14-1401-10A-01D-0703-09	Blood	499437663	100	203.212	80.0251	32.2218	5.40367	3455	507	0.146744	0.0769941	0.00359133
GBM_15_T	TCGA-14-1454-01A-01D-0932-09	Tumor	576974659	100	190.956	83.0545	37.2242	5.36883	3775	549	0.14543	0.0340921	0.0092264
GBM_15_B	TCGA-14-1454-10A-01D-0703-09	Blood	511007166	99.0655	186.402	81.9862	32.6601	4.47566	4206	619	0.147171	0.143708	0.00159324
GBM_16_T	TCGA-14-1459-01A-01D-0932-09	Tumor	722369003	100	189.653	80.0865	46.6045	6.30761	4408	697	0.158122	0.0361665	0.00799329
GBM_16_B	TCGA-14-1459-10A-01D-0703-09	Blood	641754818	100	192.863	80.3264	41.4035	5.92273	4177	613	0.146756	0.0967522	0.00146071
GBM_17_T	TCGA-16-1063-01B-01D-0932-09	Tumor	608523089	100	184.89	87.7868	39.2596	5.49506	3950	626	0.158481	0.00945433	0.0345487
GBM_17_B	TCGA-16-1063-10A-01D-0703-09	Blood	547277784	100	171.986	74.24	35.3082	3.12197	3784	600	0.158562	0.242504	0.00114628
GBM_18_T	TCGA-16-1460-01A-01D-0932-09	Tumor	520193754	100	230.995	81.0983	33.5609	8.42196	4407	630	0.142954	0.101507	0.00349608
GBM_18_B	TCGA-16-1460-10A-01D-0703-09	Blood	502510977	100	180.78	71.4463	32.4201	3.22705	4038	672	0.166419	0.162831	0.00168093
GBM_19_T	TCGA-26-1438-01A-01D-0932-09	Tumor	576055644	100	214.45	74.8245	37.1649	6.99617	4539	605	0.133289	0.116909	0.00264338
GBM_19_B	TCGA-26-1438-10A-01D-0703-09	Blood	520493102	100	188.968	81.1633	33.5802	4.56531	3739	568	0.151912	0.0782267	0.00176383
LUAD_1_T	G7164.TCGA-44-2665-01A-01D-0969-08.4	Tumor	724291697	76.3309	257.999	121.435	35.6683	27.6444	2155	636	0.295128	0.0173575	0.0208619
LUAD_1_B	G7164.TCGA-44-2665-10A-01D-0969-08.3	Blood	758781048	76.3903	211.597	131.993	37.3958	21.3439	2032	566	0.278543	0.0429386	0.00375296
LUAD_2_T	G7165.TCGA-44-2666-01A-01D-0969-08.7	Tumor	592220936	99.2245	254.413	126.106	37.9115	15.892	1923	575	0.299012	0.0336468	0.010524
LUAD_2_B	G7165.TCGA-44-2666-10A-01D-0969-08.8	Blood	755492317	80.5524	246.128	131.079	39.2624	25.6747	1929	726	0.376361	0.0388749	0.00357852
LUAD_3_T	G7166.TCGA-55-1594-01A-01D-0969-08.6	Tumor	687155259	76.3893	265.089	138.509	33.8654	28.5132	1953	590	0.302099	0.0494502	0.00366981
LUAD_3_S	G7166.TCGA-55-1594-11A-01D-0969-08.7	Normal Tissue	676045215	76.3964	274.854	136.649	33.3209	29.6531	1812	564	0.311258	0.0487369	0.0037875
LUAD_4_T	G7167.TCGA-55-1596-01A-01D-0969-08.6	Tumor	549931090	99.2206	305.038	156.875	35.2029	23.0272	1111	372	0.334833	0.00718892	0.00623816
LUAD_4_S	G7167.TCGA-55-1596-11A-01D-0969-08.8	Normal Tissue	738859292	80.8254	283.766	145.982	38.5281	33.0424	1879	694	0.369345	0.0554691	0.00436147
LUAD_5_T	G7168.TCGA-67-3771-01A-01D-0969-08.7	Tumor	674858649	99.5614	270.254	137.88	43.3483	21.273	2263	808	0.357048	0.0909614	0.0019875
LUAD_5_B	G7168.TCGA-67-3771-10A-01D-0969-08.9	Blood	719962977	80.7673	271.573	135.662	37.5158	29.2652	1870	720	0.385027	0.0258065	0.00443068
LUAD_6_T	G7169.TCGA-67-3772-01A-01D-0969-08.6	Tumor	599348264	99.3742	256.926	142.609	38.4256	17.5158	1861	594	0.319183	0.0931207	0.00170154
LUAD_6_B	G7169.TCGA-67-3772-10A-01D-0969-08.7	Blood	696348519	99.69	280.386	147.383	44.7865	24.2522	1549	516	0.333118	0.0949161	0.000796312
LUSC_1_T	G12518.TCGA-34-2596-01A-01D-0963-08.1	Tumor	793210875	101	309.273	89.7795	51.6866	28.758	2071	584	0.281989	0.00240774	0.122609
LUSC_1_S	G12518.TCGA-34-2596-11A-01D-0963-08.1	Normal Tissue	702273890	101	347.157	75.1817	45.7611	33.0673	2023	478	0.236283	0.124505	0.00232542
LUSC_2_T	G12519.TCGA-34-2600-01A-01D-0963-08.2	Tumor	588259997	101	344.237	65.032	38.3318	27.0465	2409	967	0.401411	0.157728	0.00280955
LUSC_2_S	G12519.TCGA-34-2600-11A-01D-0963-08.1	Normal Tissue	932555388	101	255.939	102.255	60.7665	22.0501	2332	636	0.272727	0.146275	0.00149493
LUSC_3_T	G12520.TCGA-60-2711-01A-01D-0963-08.1	Tumor	730303183	101	341.427	85.8305	47.5875	33.2832	2197	532	0.242148	0.0791373	0.00333559
LUSC_3_S	G12520.TCGA-60-2711-11A-01D-0963-08.1	Normal Tissue	823470326	101	332.438	82.7702	53.6584	35.1811	1931	486	0.251683	0.124063	0.00203475
LUSC_4_T	G13226.TCGA-21-1078-01A-01D-1521-08.1	Tumor	689760881	101	314.766	115.124	44.9457	27.3145	1959	542	0.276672	0.0539519	0.00517403
LUSC_4_S	G13226.TCGA-21-1078-11A-01D-1521-08.1	Normal Tissue	707171708	101	320.236	117.043	46.0802	29.1443	2454	564	0.229829	0.0366926	0.00674453
LUSC_5_T	G13227.TCGA-43-3394-01A-01D-1553-08.1	Tumor	726810539	101	319.761	108.828	47.3599	29.4298	2493	799	0.320497	0.132448	0.00224568
LUSC_5_S	G13227.TCGA-43-3394-11A-01D-1553-08.1	Normal Tissue	727051171	101	312.313	116.685	47.3756	28.3975	2523	675	0.267539	0.131694	0.00173424
LUSC_6_T	G13229.TCGA-56-1622-01A-01D-1521-08.1	Tumor	672642412	101	317.279	116.692	43.8302	27.1762	2231	667	0.298969	0.0944786	0.00279111
LUSC_6_S	G13229.TCGA-56-1622-11A-01D-1521-08.3	Normal Tissue	639255017	101	320.487	110.899	41.6547	26.1054	2280	579	0.253947	0.134133	0.00215959
LUSC_7_T	G13230.TCGA-60-2713-01A-01D-1522-08.1	Tumor	726501872	101	309.136	122.13	47.3398	28.0956	2200	591	0.268636	0.0598599	0.00445811
LUSC_7_S	G13230.TCGA-60-2713-11A-01D-1522-08.3	Normal Tissue	816142844	101	285.606	135.905	53.1809	27.897	2296	639	0.27831	0.090074	0.00241985
LUSC_8_T	G13231.TCGA-60-2724-01A-01D-1522-08.2	Tumor	949275356	101	308.252	114.633	61.856	35.9007	2683	700	0.260902	0.0356632	0.0100232
LUSC_8_S	G13231.TCGA-60-2724-11A-01D-1522-08.2	Normal Tissue	749089767	101	313.906	112.75	48.8117	29.3453	2414	621	0.257249	0.0521872	0.00664765
LUSC_9_T	G8889.TCGA-60-2695-01A-01D-1180-08.1	Tumor	726966183	101	333.481	110.772	47.3701	32.335	1258	421	0.334658	0.0354652	0.00203429
LUSC_9_S	G8889.TCGA-60-2695-11A-01D-1180-08.1	Normal Tissue	759612221	101	330.776	98.031	49.4973	32.6211	1263	392	0.310372	0.0433156	0.00186305
LUSC_10_T	G8890.TCGA-60-2722-01A-01D-1180-08.2	Tumor	750779218	101	310.209	109.227	48.9217	28.4467	1485	526	0.354209	0.0383754	0.00344641
LUSC_10_S	G8890.TCGA-60-2722-11A-01D-1180-08.1	Normal Tissue	786452232	101	329.156	104.162	51.2462	33.691	1397	533	0.381532	0.0587493	0.0018048
LUSC_11_T	G8891.TCGA-66-2756-01A-01D-1180-08.1	Tumor	657153867	101	331.459	92.8357	42.821	28.1806	2171	809	0.372639	0.0788587	0.00317832
LUSC_11_S	G8891.TCGA-66-2756-11A-01D-1180-08.1	Normal Tissue	741556422	101	329.516	104.881	48.3208	31.8632	1689	580	0.343398	0.0996661	0.00186971
LUSC_12_T	G8892.TCGA-66-2757-01A-01D-1180-08.1	Tumor	653653390	101	320.506	113.446	42.5929	26.8137	1192	358	0.300336	0.0543385	0.00122592
LUSC_12_S	G8892.TCGA-66-2757-11A-01D-1180-08.1	Normal Tissue	790040304	101	321.553	104.176	51.48	32.1368	1263	389	0.307997	0.0547479	0.00108496
LUSC_13_T	G8893.TCGA-66-2766-01A-01D-1180-08.2	Tumor	778389608	101	333.817	91.389	50.7209	33.8607	2444	1114	0.45581	0.0546893	0.00336743
LUSC_13_S	G8893.TCGA-66-2766-11A-01D-1180-08.1	Normal Tissue	745408482	101	314.628	102.125	48.5718	28.7503	1563	552	0.353167	0.0829798	0.00211476
OV_1_T	TCGA-04-1371-01A-01D-0516-08	Tumor	646371587	101	238.839	120.864	42.1184	14.3555	3971	880	0.221607	0.0286173	0.00728621
OV_1_S	TCGA-04-1371-11A-01D-0516-08	Normal Tissue	629295942	101	228.79	115.791	41.0057	12.3482	3947	906	0.229541	0.0307226	0.00653163
OV_3_T	TCGA-13-0723-01A-02D-0447-09	Tumor	764810556	75	172.416	72.3849	37.007	10.2274	5469	991	0.181203	0.162661	0.00234322
OV_3_B	TCGA-13-0723-10B-01D-0447-09	Blood	621603865	75	188.05	61.268	30.0776	9.62656	5788	1056	0.182446	0.151893	0.00260469
OV_4_T	TCGA-13-0725-01A-01D-0465-08	Tumor	641732590	99.9205	223.682	115.163	41.3692	12.1916	3558	873	0.245363	0.12038	0.00290751
OV_4_B	TCGA-13-0725-10B-01D-0446-08	Blood	612287382	99.9985	240.935	116.008	39.5018	13.7417	3466	781	0.225332	0.055097	0.00598796
OV_5_T	TCGA-13-0751-01A-01D-0446-08	Tumor	657465773	101	245.918	120.138	42.8413	15.4883	3391	746	0.219994	0.0924616	0.00401337
OV_5_B	TCGA-13-0751-10A-01D-0446-08	Blood	632731775	101	256.823	130.417	41.2296	17.1346	3347	671	0.200478	0.0595522	0.0053703
OV_6_T	TCGA-13-0890-01A-01D-0421-09	Tumor	774803905	75	199.894	73.2011	37.4905	15.1678	5277	1334	0.252795	0.0754302	0.00196013
OV_6_B	TCGA-13-0890-10A-01D-0421-09	Blood	566969815	75	178.176	67.6323	27.434	7.93413	4641	797	0.17173	0.020934	0.00602386
OV_7_T	TCGA-13-1411-01A-01D-0515-09	Tumor	792970243	75	148.541	60.2969	38.3695	5.96342	4529	1382	0.305145	0.107131	0.00121741
OV_7_B	TCGA-13-1411-10A-01D-0515-09	Blood	682187329	75	172.634	67.5923	33.0091	8.74988	4356	1306	0.299816	0.0488683	0.00337339
OV_8_T	TCGA-24-0980-01A-01D-0515-09	Tumor	740888635	75	205.499	70.9962	35.8495	15.3706	4512	1094	0.242465	0.083336	0.00176259
OV_8_B	TCGA-24-0980-10A-01D-0515-09	Blood	839894553	75	145.076	63.908	40.6401	6.26312	4527	1109	0.244975	0.104848	0.00107738
OV_9_T	TCGA-24-0982-01A-01D-0516-08	Tumor	584021056	101	257.465	114.955	38.0556	14.8585	3554	737	0.207372	0.0683848	0.00319717
OV_9_B	TCGA-24-0982-10C-01D-0516-08	Blood	595066282	101	235.841	104.57	38.7753	11.6689	3421	629	0.183864	0.0495226	0.0035874
OV_10_T	TCGA-24-1103-01A-01D-0515-09	Tumor	593875338	75	213.009	77.1452	28.7359	13.7916	4922	1617	0.328525	0.0818642	0.00202359
OV_10_B	TCGA-24-1103-10A-01D-0515-09	Blood	744670328	73.6459	185.231	70.4448	35.3819	12.2703	5916	1528	0.258283	0.0209419	0.00460346
OV_11_T	TCGA-25-1319-01A-01D-0516-08	Tumor	592210539	101	244.777	113.1	38.5892	13.3176	3378	640	0.189461	0.0344538	0.00502947
OV_11_B	TCGA-25-1319-10A-01D-0516-08	Blood	593725983	101	218.532	117.438	38.688	10.6387	3496	666	0.190503	0.0236207	0.00834255
READ_1_T	TCGA-AF-2689-01A-01D-1525-10	Tumor	541082177	100	282.552	61.7484	34.9085	14.8685	2308	876	0.379549	0.119456	0.00141094
READ_1_B	TCGA-AF-2689-10A-01D-1525-10	Blood	485995205	100	264.095	46.6117	31.3545	10.3317	2462	1215	0.493501	0.0945823	0.00221555
READ_2_T	TCGA-AG-3593-01A-01D-1525-10	Tumor	590434282	100	282.113	55.0409	38.0925	15.9491	2664	1068	0.400901	0.11723	0.00177955
READ_2_B	TCGA-AG-3593-10A-01D-1525-10	Blood	535884808	100	272.932	43.1948	34.5732	12.7427	2556	1241	0.485524	0.0870293	0.00171218
			83585716780
