# Supplementary material for: Breakpoint profiling of 64 cancer genomes reveals numerous complex rearrangements spawned by homology-independent mechanisms
Source: HighWire-hosted journal article supplement (doi:10.1101/gr.143677.112), 2013-02-14
Supplement: Supp_Table_7.xlsx [file Supp_Table_7.xlsx]

## Sheet: all breakpoints
Deletions
Breakpoint Size	Total	CNA Assoc.	% CNA Assoc.	RandomMean	RandomStd	Z-Score	FoldEnrichment
<10 kb	1126	44	3.90764	5.65	2.273	16.872	7.78761
10-100kb	369	125	33.8753	4.17	1.913	63.1626	29.976
0.1-1mb	327	181	55.3517	2.33	1.72	103.878	77.6824
1-10mb	231	149	64.5022	1.43	1.051	140.409	104.196
>10mb	181	112	61.8785	1.64	1.237	89.2158	68.2927
Total	2234	611	27.35	15.22	3.817	156.086	40.1445
Tandem Duplications
Breakpoint Size	Total	CNA Assoc.	% CNA Assoc.	RandomMean	RandomStd	Z-Score	FoldEnrichment
<10 kb	551	39	7.07804	3.89	1.684	20.8492	10.0257
10-100kb	562	263	46.7972	6.68	2.852	89.8738	39.3713
0.1-1mb	457	312	68.2713	3.42	1.65	187.018	91.2281
1-10mb	257	162	63.035	2.02	1.536	104.154	80.198
>10mb	162	99	61.1111	1.29	1.16	84.2328	76.7442
Total	1989	875	43.992	17.3	4.073	210.582	50.578
Inversions
Breakpoint Size	Total	CNA Assoc.	% CNA Assoc.	RandomMean	RandomStd	Z-Score	FoldEnrichment
<10 kb	NA	NA	NA	NA	NA	NA	NA
10-100kb	326	88	26.9939	5.99	2.655	30.8889	14.6912
0.1-1mb	262	135	51.5267	1.5	1.268	105.284	90
1-10mb	388	222	57.2165	2.25	1.485	147.98	98.6667
>10mb	278	160	57.554	2.49	1.519	103.693	64.257
Total	1254	605	48.2456	12.23	3.582	165.486	49.4685
Inter-Chromosomal
Breakpoint Size	Total	CNA Assoc.	% CNA Assoc.	RandomMean	RandomStd	Z-Score	FoldEnrichment
Total	702	268	38.1766	5.86	2.486	105.447	45.7338
All Breakpoints	Total	CNA Assoc	% CNA Assoc.	RandomMean	RandomStd	Z-Score	FoldEnrichment
Total	6179	2359	38.1777	50.61	7.521	306.926	46.6113

## Sheet: simple SV breakpoints
Deletions
Breakpoint Size	Total	CNA Assoc.	% CNA Assoc.	RandomMean	RandomStd	Z-Score	FoldEnrichment
<10 kb	1076	33	3.06691	5.6	2.262	12.1132	5.89286
10-100kb	317	104	32.8076	3.89	1.826	54.8248	26.7352
0.1-1mb	230	135	58.6957	1.95	1.62	82.1296	69.2308
1-10mb	127	86	67.7165	0.9	0.866	98.2679	95.5556
>10mb	107	65	60.7477	1.2	1.095	58.2648	54.1667
Total	1857	423	22.7787	13.54	3.68	111.266	31.2408
Tandem Duplications
Breakpoint Size	Total	CNA Assoc.	% CNA Assoc.	RandomMean	RandomStd	Z-Score	FoldEnrichment
<10 kb	536	35	6.52985	3.81	1.683	18.5324	9.18635
10-100kb	503	226	44.9304	6.43	2.721	80.6946	35.1477
0.1-1mb	364	255	70.0549	3.12	1.632	154.338	81.7308
1-10mb	131	82	62.5954	1.31	1.137	70.9675	62.5954
>10mb	84	47	55.9524	0.7	0.842	54.9881	67.1429
Total	1618	645	39.864	15.37	3.772	166.922	41.9649
Inversions
Breakpoint Size	Total	CNA Assoc.	% CNA Assoc.	RandomMean	RandomStd	Z-Score	FoldEnrichment
<10 kb	NA	NA	NA	NA	NA	NA	NA
10-100kb	246	51	20.7317	5.65	2.582	17.5639	9.02655
0.1-1mb	104	53	50.9615	0.73	0.81	64.5309	72.6027
1-10mb	135	75	55.5556	1.15	1.071	68.9542	65.2174
>10mb	138	71	51.4493	1.69	1.246	55.626	42.0118
Total	623	250	40.1284	9.22	3.008	80.0465	27.115
Inter-Chromosomal
Breakpoint Size	Total	CNA Assoc.	% CNA Assoc.	RandomMean	RandomStd	Z-Score	FoldEnrichment
Total	539	199	36.9202	4.94	2.279	85.1514	40.2834
All Breakpoints	Total	CNA Assoc	% CNA Assoc.	RandomMean	RandomStd	Z-Score	FoldEnrichment
Total	4637	1517	32.7151	43.07	7.071	208.447	35.2217

## Sheet: all breakpoint clusters
Deletions
Breakpoint Size	Total	CNA Assoc.	% CNA Assoc.	RandomMean	RandomStd	Z-Score	FoldEnrichment
<10 kb	50	11	22	0.05	0.217	50.4608	220
10-100kb	52	21	40.3846	0.28	0.511	40.5479	75
0.1-1mb	97	46	47.4227	0.38	0.674	67.6855	121.053
1-10mb	104	63	60.5769	0.53	0.67	93.2388	118.868
>10mb	74	47	63.5135	0.44	0.682	68.2698	106.818
Total	377	188	49.8674	1.68	1.207	154.366	111.905
Tandem Duplications
Breakpoint Size	Total	CNA Assoc.	% CNA Assoc.	RandomMean	RandomStd	Z-Score	FoldEnrichment
<10 kb	15	4	26.6667	0.08	0.271	14.4649	50
10-100kb	59	37	62.7119	0.25	0.517	71.0832	148
0.1-1mb	93	57	61.2903	0.3	0.519	109.249	190
1-10mb	126	80	63.4921	0.71	0.951	83.3754	112.676
>10mb	78	52	66.6667	0.59	0.788	65.2411	88.1356
Total	371	230	61.9946	1.93	1.692	134.793	119.171
Inversions
Breakpoint Size	Total	CNA Assoc.	% CNA Assoc.	RandomMean	RandomStd	Z-Score	FoldEnrichment
<10 kb	NA	NA	NA	NA	NA	NA	NA
10-100kb	80	37	46.25	0.34	0.635	57.7323	108.824
0.1-1mb	158	82	51.8987	0.77	0.87	93.3678	106.494
1-10mb	253	147	58.1028	1.1	1.004	145.319	133.636
>10mb	140	89	63.5714	0.8	0.916	96.2882	111.25
Total	631	355	56.2599	3.01	1.67	210.772	117.94
Inter-Chromosomal
Breakpoint Size	Total	CNA Assoc.	% CNA Assoc.	RandomMean	RandomStd	Z-Score	FoldEnrichment
Total	163	69	42.3313	0.92	0.879	77.4516	75
All Breakpoints	Total	CNA Assoc	% CNA Assoc.	RandomMean	RandomStd	Z-Score	FoldEnrichment
Total	1542	842	54.6044	7.54	2.872	290.55	111.671

## Sheet: mild CGRs
Deletions
Breakpoint Size	Total	CNA Assoc.	% CNA Assoc.	RandomMean	RandomStd	Z-Score	FoldEnrichment
<10 kb	10	4	40	0.02	0.14	28.4286	200
10-100kb	12	5	41.6667	0.03	0.17	29.2353	166.667
0.1-1mb	33	15	45.4545	0.06	0.237	63.038	250
1-10mb	46	10	21.7391	0.13	0.364	27.1154	76.9231
>10mb	24	10	41.6667	0.05	0.217	45.8525	200
Total	125	44	35.2	0.29	0.495	88.303	151.724
Tandem Duplications
Breakpoint Size	Total	CNA Assoc.	% CNA Assoc.	RandomMean	RandomStd	Z-Score	FoldEnrichment
<10 kb	6	0	0	0	0	NA	NA
10-100kb	16	7	43.75	0.09	0.319	21.6614	77.7778
0.1-1mb	17	10	58.8235	0.06	0.237	41.9409	166.667
1-10mb	21	9	42.8571	0.19	0.417	21.1271	47.3684
>10mb	19	13	68.4211	0.08	0.271	47.6753	162.5
Total	79	39	49.3671	0.42	0.709	54.4147	92.8571
Inversions
Breakpoint Size	Total	CNA Assoc.	% CNA Assoc.	RandomMean	RandomStd	Z-Score	FoldEnrichment
<10 kb	NA	NA	NA	NA	NA	NA	NA
10-100kb	13	3	23.0769	0.1	0.331	8.76133	30
0.1-1mb	25	10	40	0.13	0.336	29.375	76.9231
1-10mb	32	19	59.375	0.15	0.357	52.8011	126.667
>10mb	20	11	55	0.11	0.312	34.9038	100
Total	90	43	47.7778	0.49	0.591	71.9289	87.7551
Inter-Chromosomal
Breakpoint Size	Total	CNA Assoc.	% CNA Assoc.	RandomMean	RandomStd	Z-Score	FoldEnrichment
Total	84	32	38.0952	0.39	0.581	54.4062	82.0513
All Breakpoints	Total	CNA Assoc	% CNA Assoc.	RandomMean	RandomStd	Z-Score	FoldEnrichment
Total	378	158	41.7989	1.59	1.132	138.171	99.3711

## Sheet: extreme CGRs
Deletions
Breakpoint Size	Total	CNA Assoc.	% CNA Assoc.	RandomMean	RandomStd	Z-Score	FoldEnrichment
<10 kb	9	3	33.3333	0.02	0.14	21.2857	150
10-100kb	12	4	33.3333	0.06	0.237	16.6245	66.6667
0.1-1mb	33	14	42.4242	0.07	0.255	54.6275	200
1-10mb	46	22	47.8261	0.17	0.375	58.2133	129.412
>10mb	24	13	54.1667	0.11	0.312	41.3141	118.182
Total	124	56	45.1613	0.43	0.587	94.6678	130.233
Tandem Duplications
Breakpoint Size	Total	CNA Assoc.	% CNA Assoc.	RandomMean	RandomStd	Z-Score	FoldEnrichment
<10 kb	0	0	NA	0	0	NA	NA
10-100kb	9	8	88.8889	0.03	0.17	46.8824	266.667
0.1-1mb	25	11	44	0.06	0.237	46.1603	183.333
1-10mb	51	25	49.0196	0.15	0.357	69.6078	166.667
>10mb	25	17	68	0.13	0.364	46.3462	130.769
Total	110	61	55.4545	0.37	0.559	108.462	164.865
Inversions
Breakpoint Size	Total	CNA Assoc.	% CNA Assoc.	RandomMean	RandomStd	Z-Score	FoldEnrichment
<10 kb	NA	NA	NA	NA	NA	NA	NA
10-100kb	30	13	43.3333	0.1	0.3	43	130
0.1-1mb	65	35	53.8462	0.24	0.531	65.4614	145.833
1-10mb	99	41	41.4141	0.29	0.57	71.4211	141.379
>10mb	55	27	49.0909	0.26	0.54	49.5185	103.846
Total	249	116	46.5863	0.89	0.988	116.508	130.337
Inter-Chromosomal
Breakpoint Size	Total	CNA Assoc.	% CNA Assoc.	RandomMean	RandomStd	Z-Score	FoldEnrichment
Total	27	10	37.037	0.07	0.255	38.9412	142.857
All Breakpoints	Total	CNA Assoc	% CNA Assoc.	RandomMean	RandomStd	Z-Score	FoldEnrichment
Total	510	243	47.6471	1.76	1.335	180.704	138.068

## Sheet: stepwise breakpoint clusters
Deletions
Breakpoint Size	Total	CNA Assoc.	% CNA Assoc.	RandomMean	RandomStd	Z-Score	FoldEnrichment
<10 kb	31	4	12.9032	0.01	0.099	40.303	400
10-100kb	28	12	42.8571	0.19	0.392	30.1276	63.1579
0.1-1mb	41	17	41.4634	0.25	0.554	30.2347	68
1-10mb	42	31	73.8095	0.23	0.443	69.4582	134.783
>10mb	36	24	66.6667	0.28	0.549	43.2058	85.7143
Total	178	88	49.4382	0.96	0.968	89.9174	91.6667
Tandem Duplications
Breakpoint Size	Total	CNA Assoc.	% CNA Assoc.	RandomMean	RandomStd	Z-Score	FoldEnrichment
<10 kb	9	4	44.4444	0.08	0.271	14.4649	50
10-100kb	34	22	64.7059	0.13	0.364	60.0824	169.231
0.1-1mb	51	36	70.5882	0.18	0.384	93.2812	200
1-10mb	54	46	85.1852	0.37	0.626	72.8914	124.324
>10mb	34	22	64.7059	0.38	0.628	34.4268	57.8947
Total	182	130	71.4286	1.14	1.216	105.97	114.035
Inversions
Breakpoint Size	Total	CNA Assoc.	% CNA Assoc.	RandomMean	RandomStd	Z-Score	FoldEnrichment
<10 kb	NA	NA	NA	NA	NA	NA	NA
10-100kb	37	21	56.7568	0.14	0.374	55.7754	150
0.1-1mb	68	37	54.4118	0.4	0.583	62.7787	92.5
1-10mb	122	87	71.3115	0.66	0.79	109.291	131.818
>10mb	65	51	78.4615	0.43	0.636	79.5126	118.605
Total	292	196	67.1233	1.63	1.188	163.611	120.245
Inter-Chromosomal
Breakpoint Size	Total	CNA Assoc.	% CNA Assoc.	RandomMean	RandomStd	Z-Score	FoldEnrichment
Total	52	27	51.9231	0.46	0.639	41.5336	58.6957
All Breakpoints	Total	CNA Assoc	% CNA Assoc.	RandomMean	RandomStd	Z-Score	FoldEnrichment
Total	704	441	62.642	1.59	1.132	388.171	277.358
