# Supplementary material for: Breakpoint profiling of 64 cancer genomes reveals numerous complex rearrangements spawned by homology-independent mechanisms
Source: HighWire-hosted journal article supplement (doi:10.1101/gr.143677.112), 2013-02-14
Supplement: Supp_Table_8.xlsx [file Supp_Table_8.xlsx]

## Sheet: hydra.tumor.validated
Dataset	Deletion				Tandem Duplications				Inversions				Intra-chromosomal				Inter-chromosomal
	Validated	Total	% Validated		Validated	Total	% Validated		Validated	Total	% Validated		Validated	Total	% Validated		Validated	Total	% Validated
BRCA_1_T	48	61	0.786885		66	88	0.75		4	9	0.444444		11	24	0.458333		31	40	0.775
BRCA_2_T	42	67	0.626866		124	165	0.751515		6	9	0.666667		12	21	0.571429		39	44	0.886364
BRCA_3_T	29	38	0.763158		1	5	0.2		21	141	0.148936		10	14	0.714286		5	8	0.625
BRCA_4_T	31	49	0.632653		59	91	0.648352		10	15	0.666667		21	34	0.617647		14	23	0.608696
BRCA_5_T	53	64	0.828125		91	118	0.771186		2	2	1		15	20	0.75		16	20	0.8
BRCA_6_T	33	44	0.75		3	4	0.75		2	4	0.5		6	13	0.461538		4	6	0.666667
BRCA_7_T	24	41	0.585366		19	22	0.863636		2	3	0.666667		13	15	0.866667		6	6	1
BRCA_8_T	37	45	0.822222		1	1	1		2	2	1		10	11	0.909091		14	15	0.933333
BRCA_9_T	1	2	0.5		62	81	0.765432		1	1	1		9	11	0.818182		1	4	0.25
BRCA_10_T	9	12	0.75		29	34	0.852941		0	1	0		5	5	1		0	0	NA
BRCA_11_T	7	10	0.7		2	5	0.4		2	2	1		1	4	0.25		2	2	1
BRCA_12_T	16	20	0.8		35	48	0.729167		3	3	1		4	7	0.571429		0	3	0
COAD_1_T	12	27	0.444444		6	12	0.5		0	2	0		3	4	0.75		3	6	0.5
COAD_2_T	1	1	1		0	2	0		0	0	NA		0	0	NA		0	1	0
COAD_3_T	10	21	0.47619		2	5	0.4		1	2	0.5		2	6	0.333333		1	1	1
GBM_2_T	4	9	0.444444		8	14	0.571429		2	4	0.5		1	2	0.5		1	4	0.25
GBM_3_T	5	9	0.555556		3	4	0.75		6	10	0.6		30	49	0.612245		0	0	NA
GBM_4_T	5	8	0.625		3	3	1		1	2	0.5		3	5	0.6		0	0	NA
GBM_5_T	2	4	0.5		2	6	0.333333		0	8	0		6	8	0.75		2	2	1
GBM_6_T	21	40	0.525		9	17	0.529412		22	59	0.372881		67	172	0.389535		2	8	0.25
GBM_7_T	11	32	0.34375		2	4	0.5		3	7	0.428571		18	24	0.75		1	12	0.0833333
GBM_8_T	2	15	0.133333		4	11	0.363636		4	11	0.363636		50	62	0.806452		7	9	0.777778
GBM_9_T	6	16	0.375		1	8	0.125		10	17	0.588235		16	34	0.470588		0	1	0
GBM_10_T	8	14	0.571429		6	11	0.545455		5	14	0.357143		5	7	0.714286		4	15	0.266667
GBM_11_T	0	0	NA		0	0	NA		1	2	0.5		1	2	0.5		0	0	NA
GBM_12_T	4	13	0.307692		0	0	NA		0	2	0		2	3	0.666667		2	4	0.5
GBM_13_T	4	7	0.571429		0	3	0		8	10	0.8		18	24	0.75		1	1	1
GBM_14_T	2	5	0.4		0	3	0		1	1	1		3	8	0.375		0	0	NA
GBM_15_T	2	2	1		0	0	NA		0	0	NA		1	1	1		0	0	NA
GBM_16_T	14	17	0.823529		12	16	0.75		13	17	0.764706		30	43	0.697674		6	9	0.666667
GBM_17_T	3	4	0.75		4	9	0.444444		1	1	1		5	7	0.714286		11	13	0.846154
GBM_18_T	5	5	1		2	2	1		0	0	NA		3	4	0.75		0	0	NA
GBM_19_T	3	15	0.2		3	9	0.333333		0	9	0		16	36	0.444444		7	10	0.7
LUAD_1_T	4	5	0.8		0	0	NA		2	2	1		14	16	0.875		6	9	0.666667
LUAD_2_T	7	8	0.875		0	0	NA		1	1	1		2	2	1		0	1	0
LUAD_3_T	3	8	0.375		11	16	0.6875		2	5	0.4		35	55	0.636364		6	12	0.5
LUAD_4_T	1	1	1		1	1	1		0	1	0		1	1	1		1	1	1
LUAD_5_T	70	76	0.921053		43	49	0.877551		3	4	0.75		19	32	0.59375		26	28	0.928571
LUAD_6_T	3	5	0.6		0	1	0		0	0	NA		10	11	0.909091		5	5	1
LUSC_1_T	11	13	0.846154		9	14	0.642857		4	4	1		13	19	0.684211		9	17	0.529412
LUSC_2_T	14	22	0.636364		3	7	0.428571		1	2	0.5		3	6	0.5		5	10	0.5
LUSC_3_T	17	29	0.586207		12	20	0.6		2	6	0.333333		15	30	0.5		10	28	0.357143
LUSC_4_T	1	1	1		0	0	NA		0	0	NA		1	1	1		0	0	NA
LUSC_5_T	12	21	0.571429		7	18	0.388889		9	24	0.375		34	54	0.62963		8	19	0.421053
LUSC_6_T	34	39	0.871795		4	4	1		3	5	0.6		37	51	0.72549		11	14	0.785714
LUSC_7_T	21	26	0.807692		8	13	0.615385		2	6	0.333333		3	8	0.375		14	26	0.538462
LUSC_8_T	29	39	0.74359		11	14	0.785714		6	11	0.545455		10	14	0.714286		9	12	0.75
LUSC_9_T	4	6	0.666667		4	11	0.363636		0	1	0		1	4	0.25		0	4	0
LUSC_10_T	11	13	0.846154		12	20	0.6		2	5	0.4		9	20	0.45		10	15	0.666667
LUSC_11_T	26	46	0.565217		27	36	0.75		15	34	0.441176		146	187	0.780749		20	30	0.666667
LUSC_12_T	4	8	0.5		1	3	0.333333		0	4	0		2	17	0.117647		0	4	0
LUSC_13_T	318	382	0.832461		150	225	0.666667		15	23	0.652174		22	29	0.758621		22	32	0.6875
OV_1_T	12	17	0.705882		10	11	0.909091		3	6	0.5		13	25	0.52		10	22	0.454545
OV_3_T	21	36	0.583333		25	34	0.735294		9	17	0.529412		35	54	0.648148		13	27	0.481481
OV_4_T	28	34	0.823529		41	50	0.82		0	0	NA		11	13	0.846154		10	12	0.833333
OV_5_T	17	27	0.62963		60	77	0.779221		11	14	0.785714		17	25	0.68		14	21	0.666667
OV_6_T	53	75	0.706667		17	24	0.708333		5	7	0.714286		15	24	0.625		4	5	0.8
OV_7_T	10	17	0.588235		6	6	1		5	6	0.833333		3	4	0.75		6	8	0.75
OV_8_T	3	4	0.75		6	7	0.857143		0	0	NA		1	2	0.5		2	2	1
OV_9_T	9	17	0.529412		15	20	0.75		5	6	0.833333		18	25	0.72		4	6	0.666667
OV_10_T	57	71	0.802817		51	61	0.836066		1	4	0.25		17	23	0.73913		14	18	0.777778
OV_11_T	11	16	0.6875		5	11	0.454545		5	14	0.357143		18	51	0.352941		6	40	0.15
READ_1_T	13	19	0.684211		2	4	0.5		0	5	0		6	11	0.545455		0	1	0
READ_2_T	16	24	0.666667		7	12	0.583333		0	1	0		1	3	0.333333		3	6	0.5
