# Supplementary material for: Breakpoint profiling of 64 cancer genomes reveals numerous complex rearrangements spawned by homology-independent mechanisms
Source: HighWire-hosted journal article supplement (doi:10.1101/gr.143677.112), 2013-02-14
Supplement: Supp_Table_9.xlsx [file Supp_Table_9.xlsx]

## Sheet: sheet
(A) raw validation rate
Size Range	Deletion	Tandem Duplications	Inversions	Total
<10kb	0.738011	0.740472	NA	0.738819
10-100kb	0.677507	0.69395	0.346626	0.599045
0.1-1mb	0.64939	0.676149	0.5	0.624283
1-10mb	0.627706	0.583658	0.554124	0.582192
>10mb	0.651934	0.734568	0.654676	0.674718
Inter-Chrom	NA	NA	NA	0.609687
TOTAL	0.696956	0.691805	0.511164	0.647678
(B) corrected validation rate
Size Range	Deletion	Tandem Duplications	Inversions	Total
<10kb	0.960951	0.964156	NA	0.962004
10-100kb	0.88217	0.903581	0.451336	0.780007
0.1-1mb	0.84556	0.880402	0.651042	0.812868
1-10mb	0.817325	0.759971	0.721515	0.758062
>10mb	0.848872	0.956469	0.852443	0.878539
Inter-Chrom	NA	NA	NA	0.793863
TOTAL	0.907495	0.900788	0.665578	0.84333
(C) corrected FDR
Size Range	Deletion	Tandem Duplications	Inversions	Total
<10kb	0.0390486	0.0358439	NA	0.0379957
10-100kb	0.11783	0.096419	0.548664	0.219993
0.1-1mb	0.15444	0.119598	0.348958	0.187132
1-10mb	0.182675	0.240029	0.278485	0.241938
>10mb	0.151128	0.0435314	0.147557	0.121461
Inter-Chrom	NA	NA	NA	0.206137
TOTAL	0.092505	0.0992123	0.334422	0.15667
(D) number breakpoints
Size Range	Deletion	Tandem Duplications	Inversions	Total
<10kb	1126	551	NA	1677
10-100kb	369	562	326	1257
0.1-1mb	328	457	262	1046
1-10mb	231	257	388	876
>10mb	181	162	278	621
Inter-Chrom	NA	NA	NA	702
TOTAL	2234	1989	1254	6179
